# Supplementary material
Source: Springer Nature journal article supplement (https://www.springermedizin.de/resource/supplementary/13058_2008_2220_MOESM2_ESM.pdf/9700920)

**Supplementary Figure 1A.** Confirmatory real-time PCR analysis of genes down-regulated (left panel) or up-regulated (right panel), during differentiation of HC11 cells. Ranking of the likelihood of differential expression in the microarray analysis below. Average of three cell cultures and differentiations.

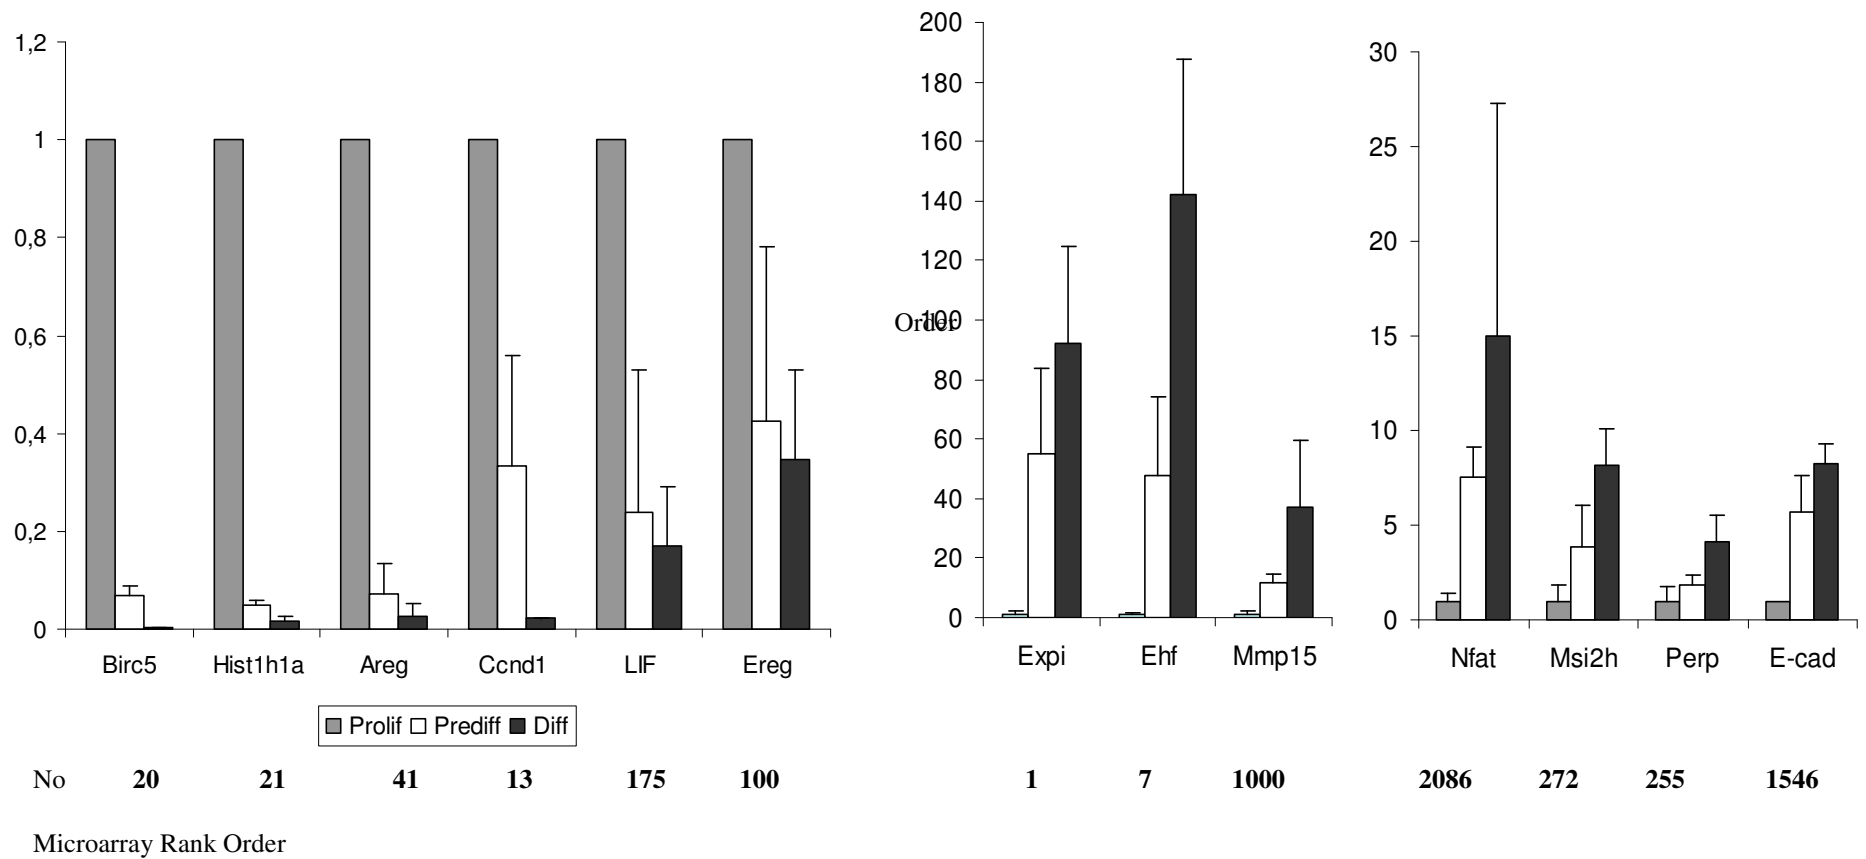

Supplement: MOESM2 [file 9700920]
